# Supplementary material
Source: Springer Nature journal article supplement (https://www.springermedizin.de/resource/supplementary/13023_2009_291_MOESM1_ESM.pdf/9642044)

**a**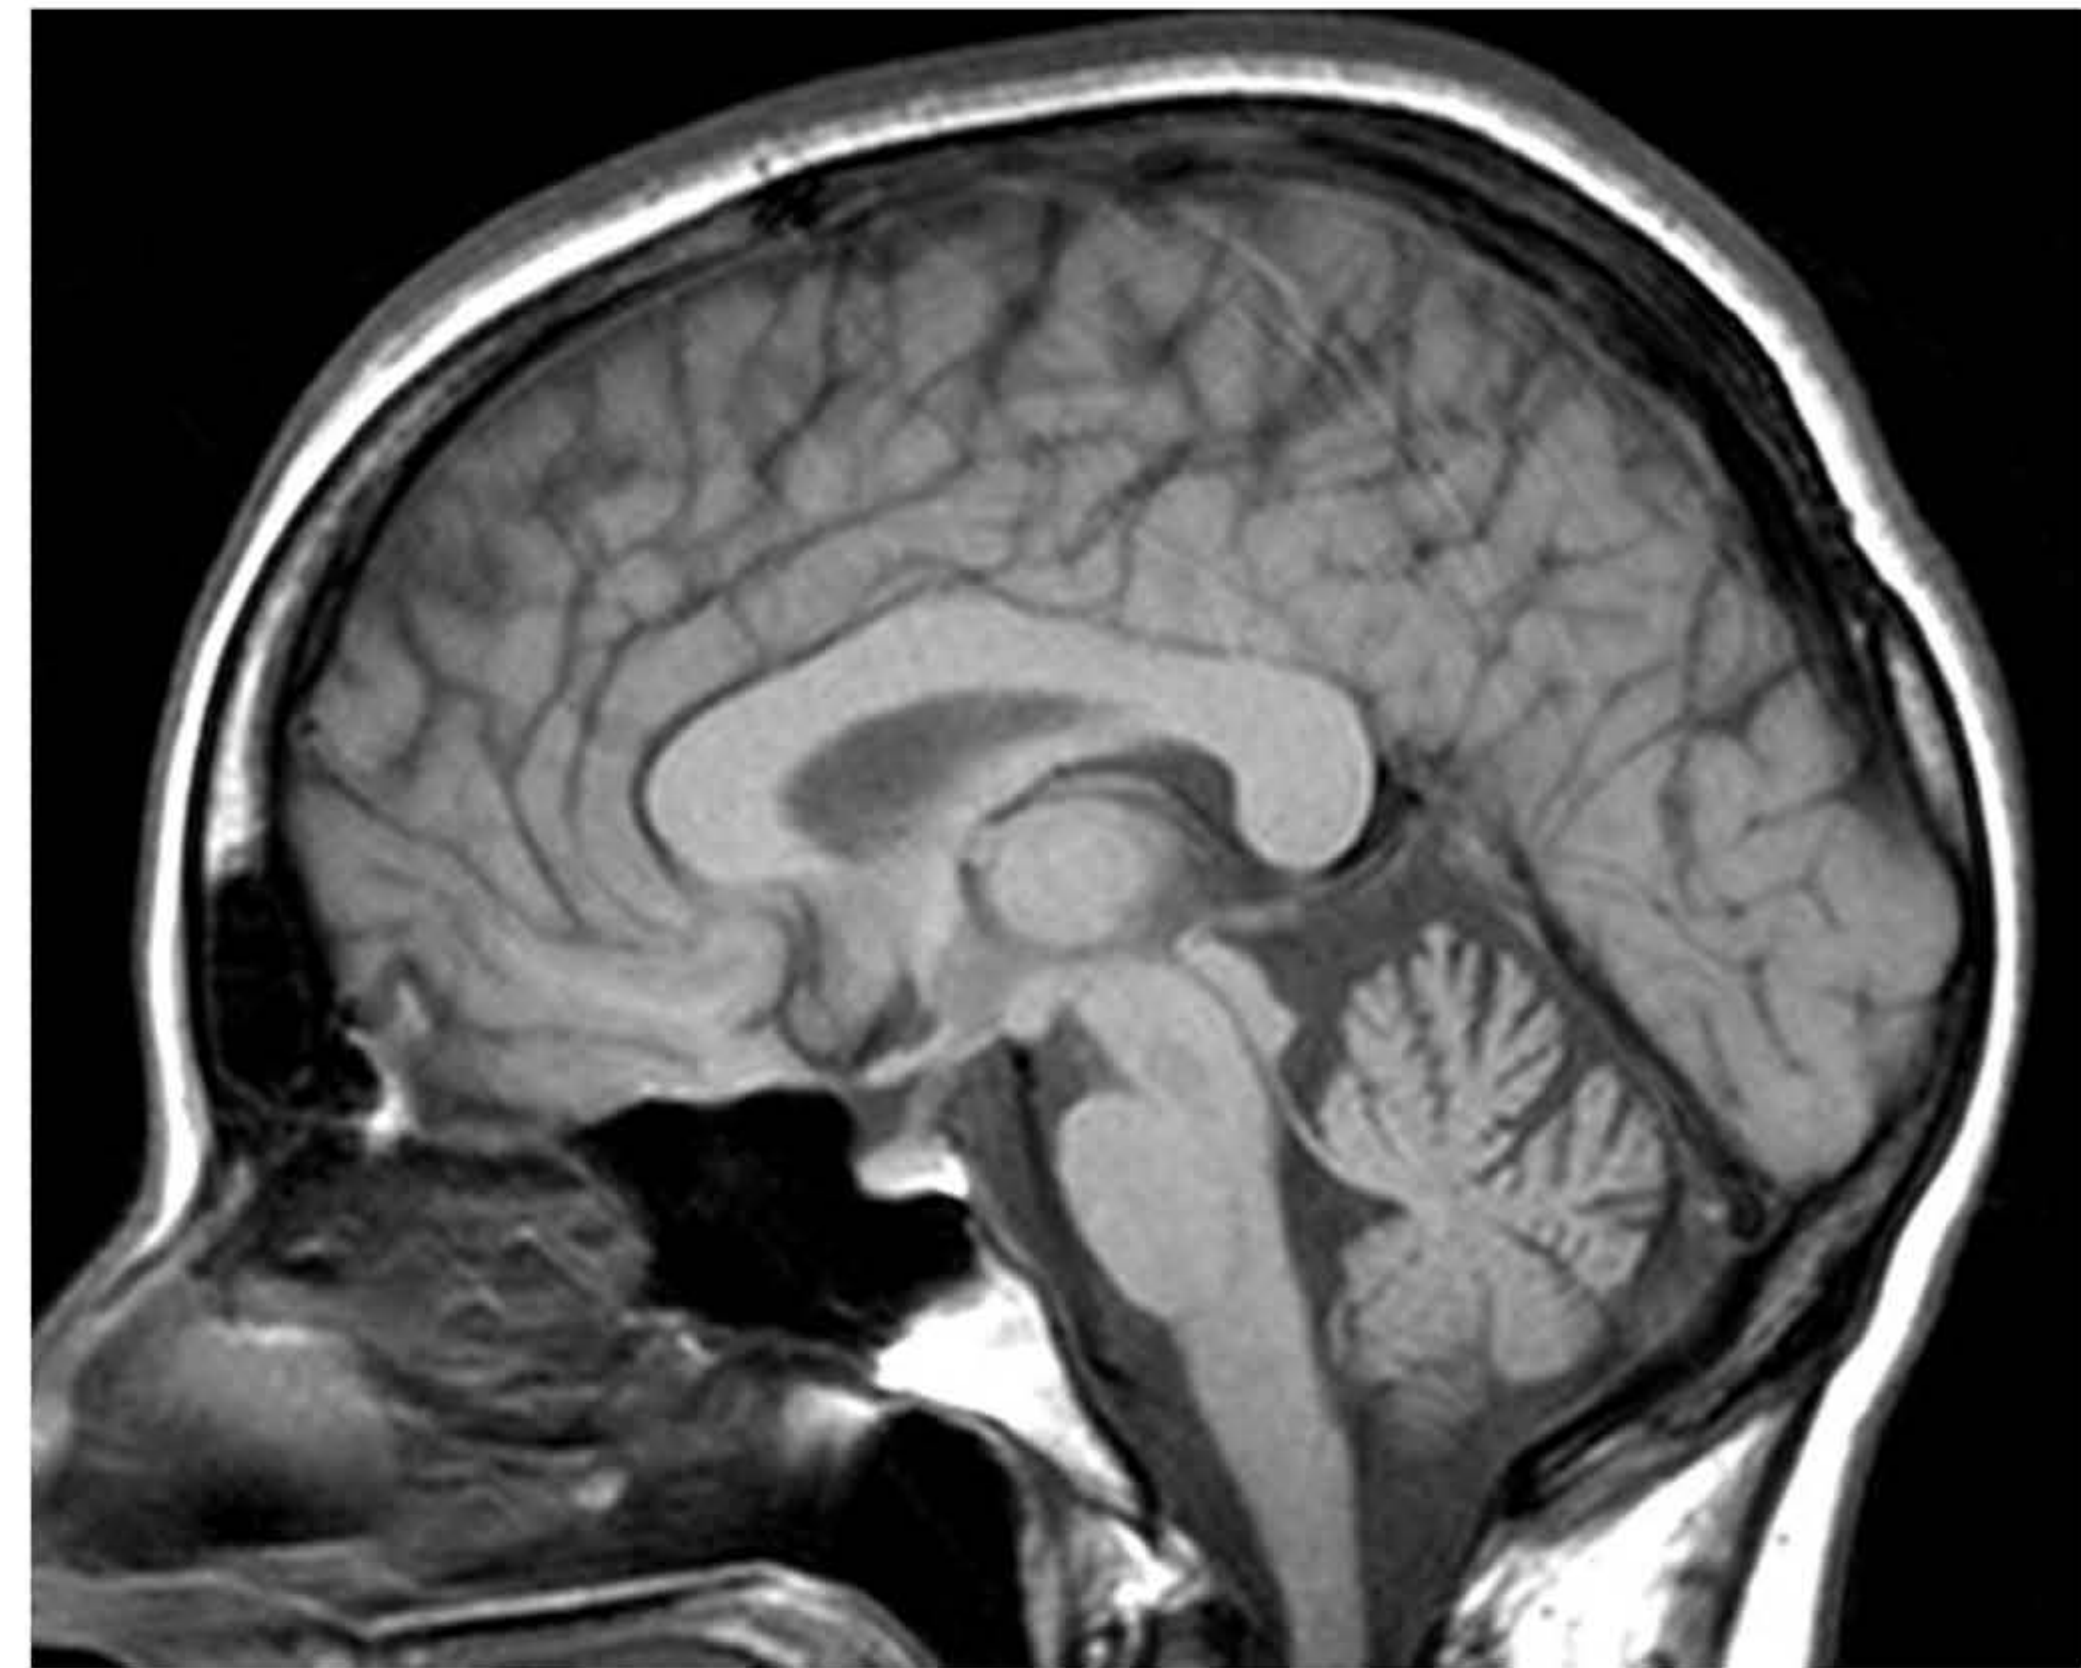**b**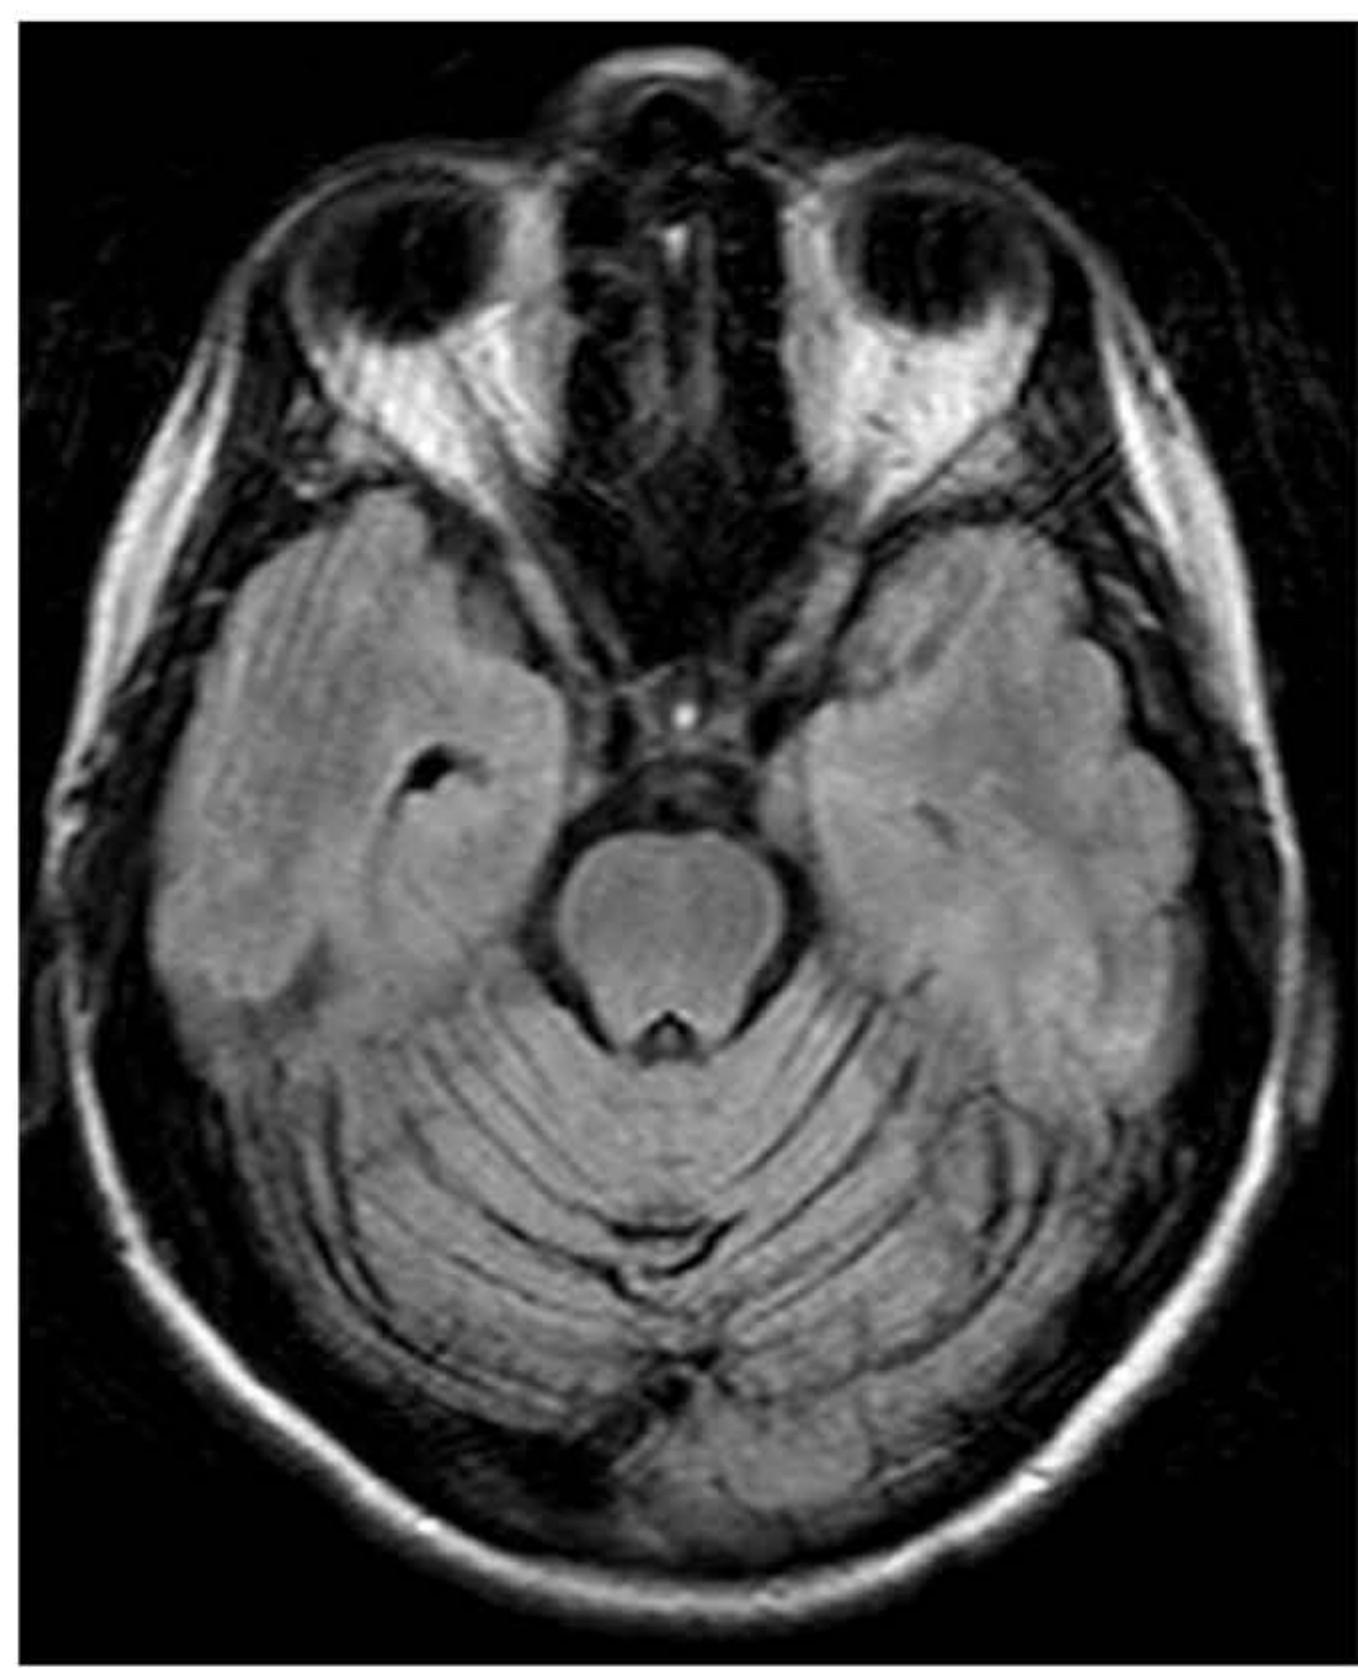

Supplement: MOESM1 [file 9642044]
